# Supplementary figures and images for: High-Dose Acetaminophen with N-acetylcysteine Rescue Inhibits M2 Polarization of Tumor-Associated Macrophages
Source: MDPI journal article supplement (doi:10.3390/cancers15194770), 2023-09-28

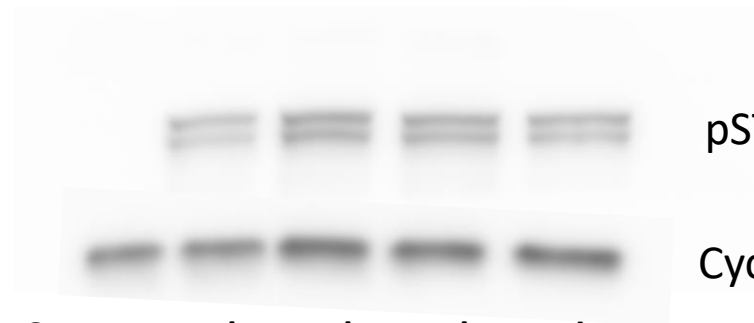

pSTAT1

Cyclophilin

|         |   |   |   |   |   |
|---------|---|---|---|---|---|
| IFN/LPS | - | + | + | + | + |
| AAP     | - | - | - | + | - |
| NAC     | - | - | + | - | + |

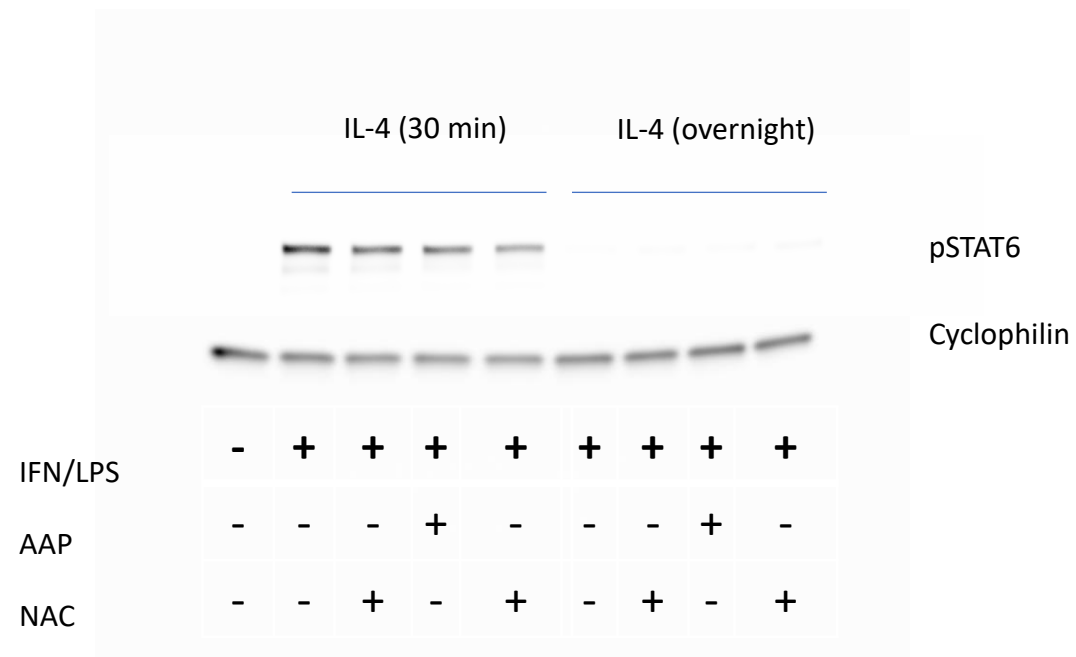

Supplement: s1 [file s1]
